# Supplementary material for: Modification of Male Courtship Motivation by Olfactory Habituation via the GABAA Receptor in Drosophila melanogaster
Source: PubMed Central journal article supplement (PMC4529276; doi:10.1371/journal.pone.0135186), 2015-08-07

S2 Fig.

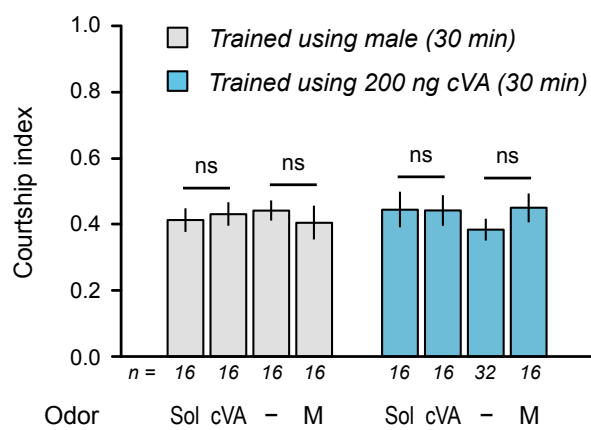

Supplement: pone.0135186.s002.pdf [file pone.0135186.s002.pdf]
